# Supplementary material for: Spread of Carbapenem-Resistant Klebsiella pneumoniae Clinical Isolates Producing NDM-Type Metallo-β-Lactamase in Myanmar
Source: PubMed Central journal article supplement (PMC9431462; doi:10.1128/spectrum.00673-22), 2022-06-28
Supplement: spectrum.00673-22-s0001.pdf [file spectrum.00673-22-s0001.pdf]

**Table S1** Summary of the characteristics of the 8 carbapenem-resistant *K. quasipneumoniae* subsp. *similipneumoniae* and *K. quasipneumoniae* subsp. *quasipneumoniae*, including MLSTs and drug resistance genes

| MLST   | Plasmid type                           | Number of isolates | Hospitals | Carbapenemase genes(s)      | Extended spectrum $\beta$ -lactamase encoding gene(s) | 16S rRNA methylase gene(s) | Aminoglycoside acetyltransferase-encoding gene(s) | Mutation(s) in DNA gyrase |      |
|--------|----------------------------------------|--------------------|-----------|-----------------------------|-------------------------------------------------------|----------------------------|---------------------------------------------------|---------------------------|------|
|        |                                        |                    |           |                             |                                                       |                            |                                                   | GyrA                      | ParC |
| ST705  | IncM2                                  | 2                  | E         | <i>bla</i> <sub>NDM-1</sub> | <i>bla</i> <sub>CTX-M-15</sub>                        | <i>armA</i>                | <i>aac(3)-IIId, aadA16</i>                        | -                         | -    |
| ST1473 | IncC                                   | 3                  | H         | <i>bla</i> <sub>NDM-1</sub> | <i>bla</i> <sub>CTX-M-15</sub>                        | <i>armA</i>                | <i>aac(6')-Ib-cr</i>                              | -                         | -    |
| ST3590 | IncX3                                  | 1                  | A         | <i>bla</i> <sub>NDM-7</sub> | <i>bla</i> <sub>CTX-M-15</sub>                        | -                          | <i>aac(6')-Ib-cr</i>                              | -                         | -    |
| ST3866 | IncX3                                  | 1                  | H         | <i>bla</i> <sub>NDM-7</sub> | <i>bla</i> <sub>CTX-M-15</sub>                        | -                          | <i>aac(3)-IIa, aac(6')-Ib-cr, aadA2</i>           | -                         | -    |
| ST5967 | IncFIB(pNDM-Mar)/<br>IncHI1B(pNDM-MAR) | 1                  | G         | <i>bla</i> <sub>NDM-1</sub> | <i>bla</i> <sub>CTX-M-15</sub>                        | <i>armA</i>                | <i>aac(3)-IIId, aac(6')-Ib-cr, aadA2, aadA16</i>  | -                         | -    |

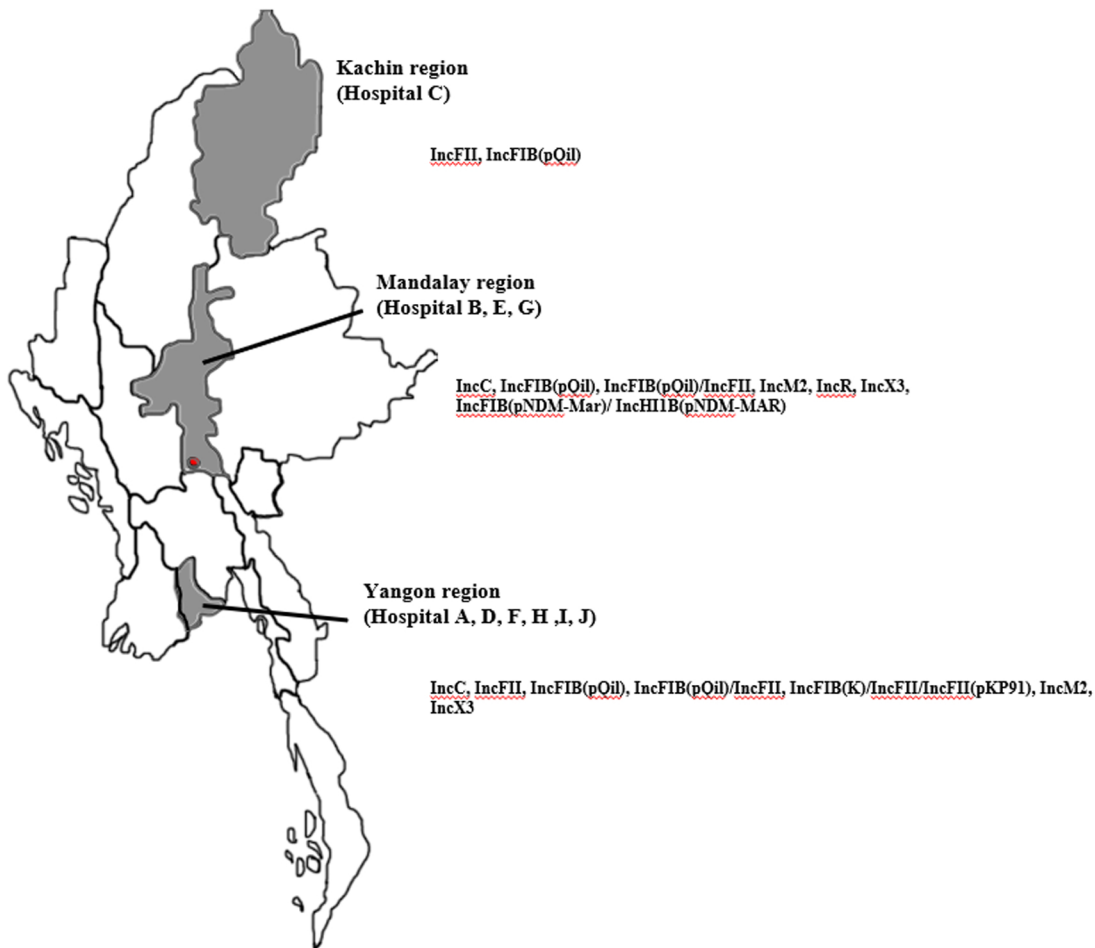

### Figure S1

Relation between geographical locations of the 10 hospitals in Myanmar and plasmid Inc types from the 46 carbapenem-resistant *K. pneumoniae* complex isolates. IncFIB(pOil) are spreading in three regions of Myanmar.
